# Supplementary material for: Structure modulation, argentophilic interactions and photoluminescence properties of silver(i) coordination polymers with isomeric N-donor ligands
Source: Royal Society of Chemistry journal article supplement (doi:10.1039/c2ra20642k), 2012-01-01
Supplement: c2ra20642k.pdf [file c2ra20642k.pdf]

Supporting Information

**Structural Modulation, Argentophilic Interactions and Photoluminescence Properties of Silver(I) Coordination Polymers with Isomeric N-donor Ligands**

**Kamal Kumar Bisht<sup>a</sup>, Amal Cherian Kathalikkattil<sup>a,b</sup> and Eringathodi Suresh<sup>a,\*</sup>**

<sup>a</sup>Analytical Discipline and Centralized Instrument Facility, Central Salt and Marine Chemicals Research Institute, Council of Scientific and Industrial Research (CSIR) G.B.Marg, Bhavnagar -364 002, Gujarat, India.

<sup>b</sup>Department of Chemical Engineering, Pusan National University, Jangjun-Dong, Gumjung-gu, Busan, 609-735, Republic of Korea.

E-mail: [esuresh@csmcri.org](mailto:esuresh@csmcri.org) and [sureshe123@rediffmail.com](mailto:sureshe123@rediffmail.com)

---

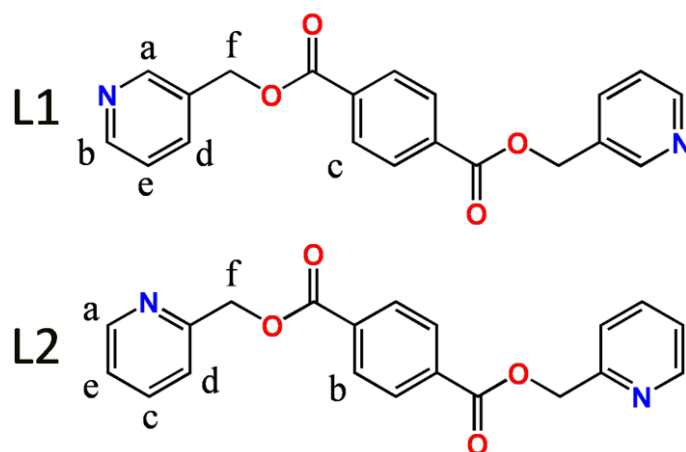

**Scheme S1.** Chemical structures of linkers bis(pyridine-3-ylmethyl)terephthalate (**L1**) and bis(pyridine-2-ylmethyl)terephthalate (**L2**). Lowercase alphabets are given to indicate the respective protons in nmr spectra.

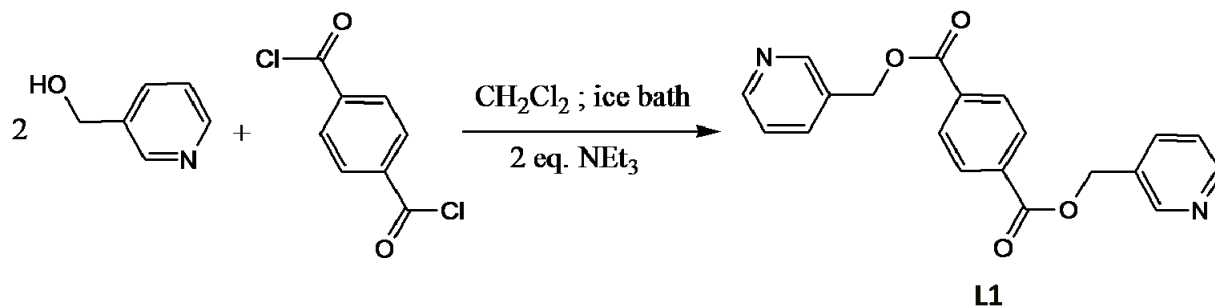

**Scheme S2.** Synthetic procedure to prepare bis(pyridine-3-ylmethyl)terephthalate (**L1**).

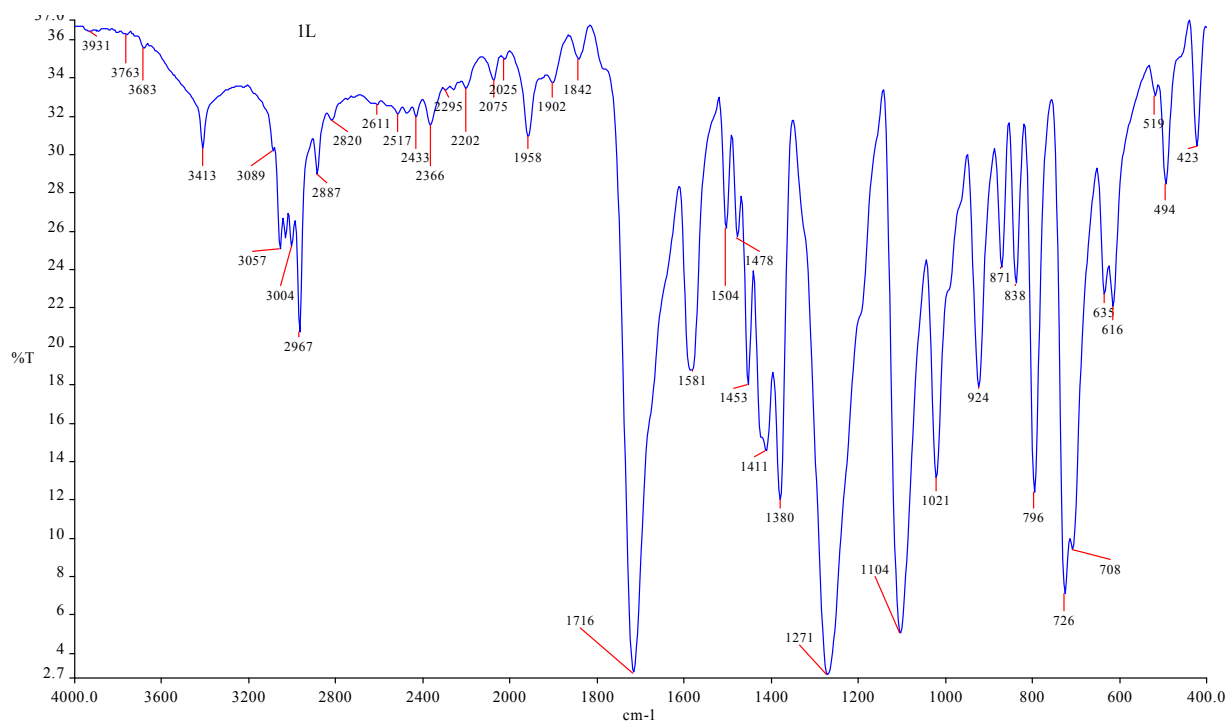

21

22 **S3:** FTIR spectra for compound bis(pyridine-3-ylmethyl)terephthalate (**L1**)

23

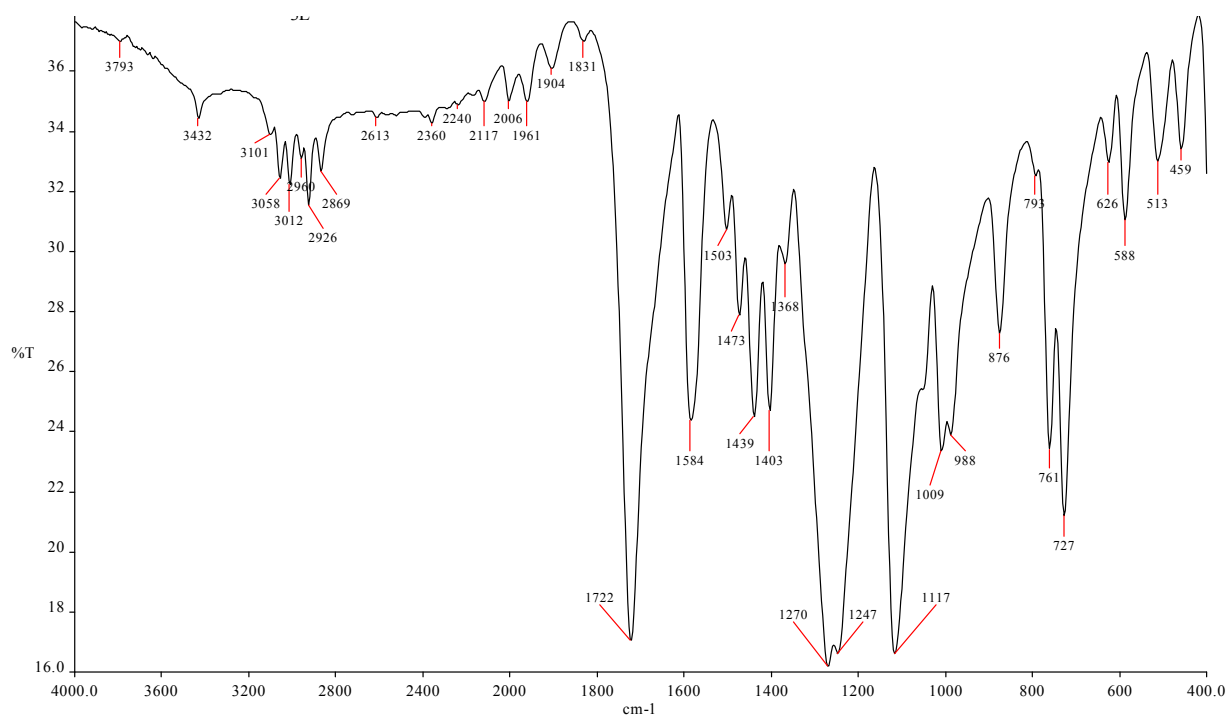

24

25 **S4:** FTIR spectra for compound bis(pyridine-2-ylmethyl)terephthalate (**L2**)

26

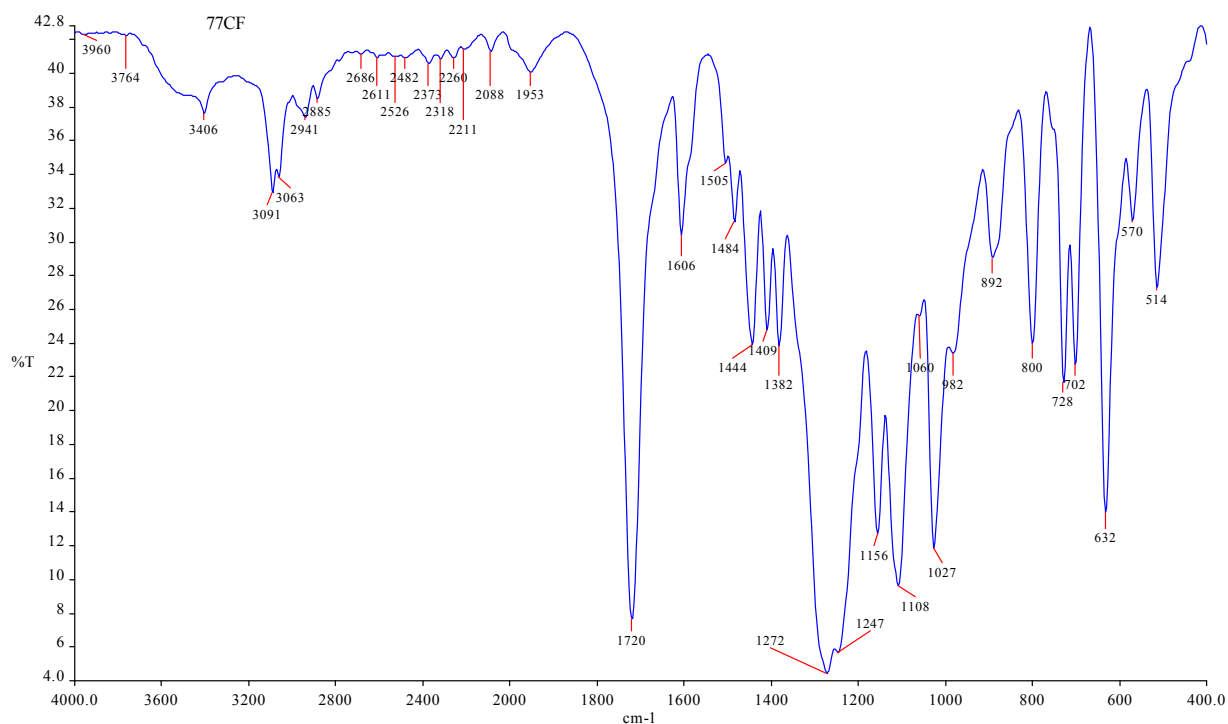

27

28 **S5: FTIR spectra for coordination polymer 1**

29

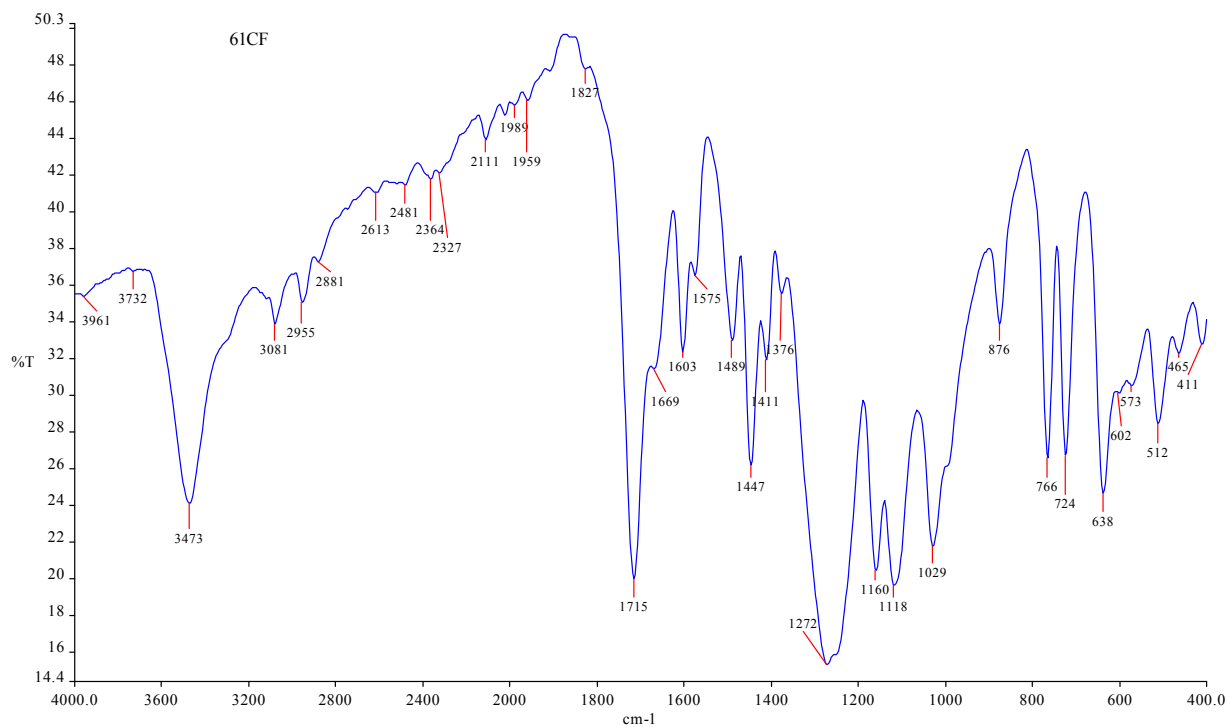

30

31 **S6: FTIR spectra for coordination polymer 2**

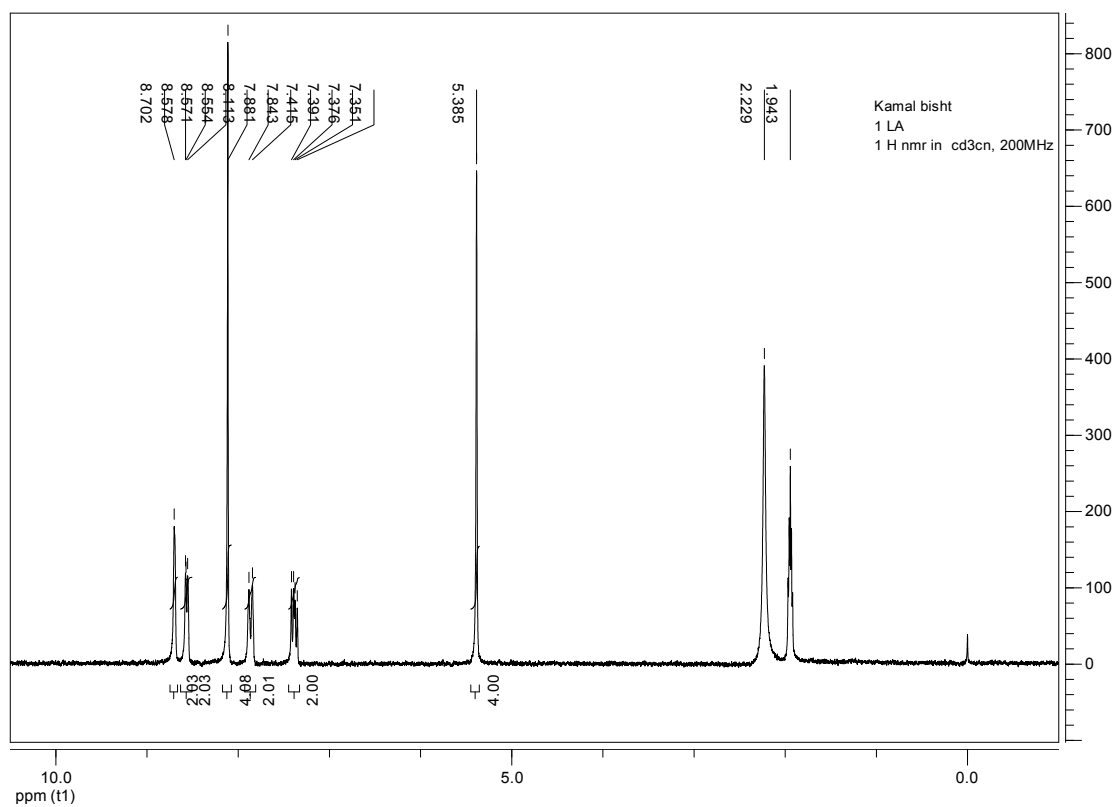

32

33 **S7:**  $^1\text{H}$  NMR spectra for **L1** in  $d_3$ -acetonitrile

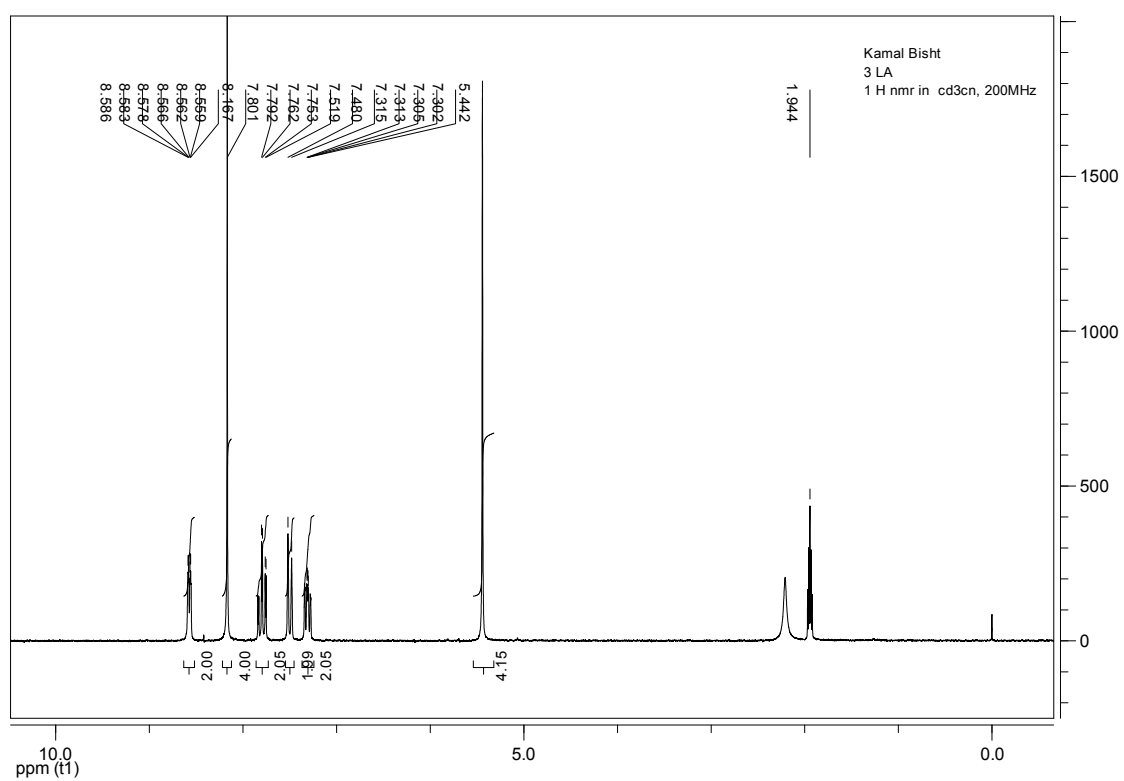

34

35 **S8:**  $^1\text{H}$  NMR spectra for **L2** in  $d_3$ -acetonitrile

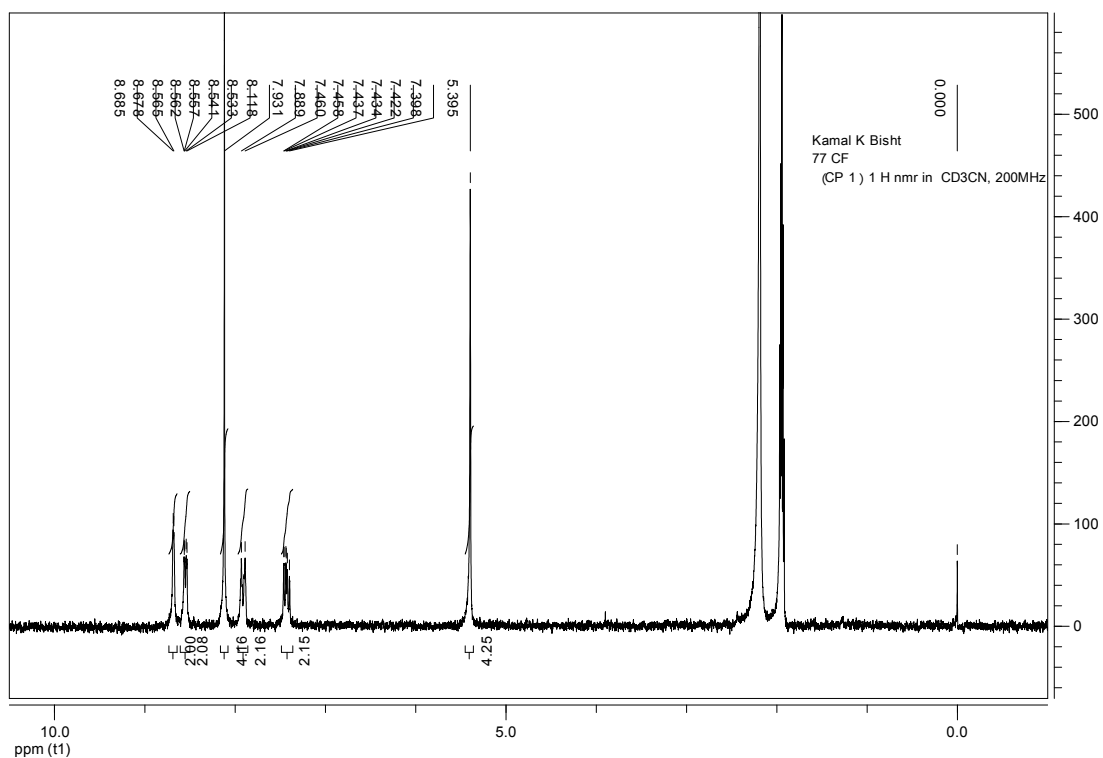

36

37 **S9:** <sup>1</sup>H NMR spectra for **1** in *d*<sub>3</sub>-acetonitrile

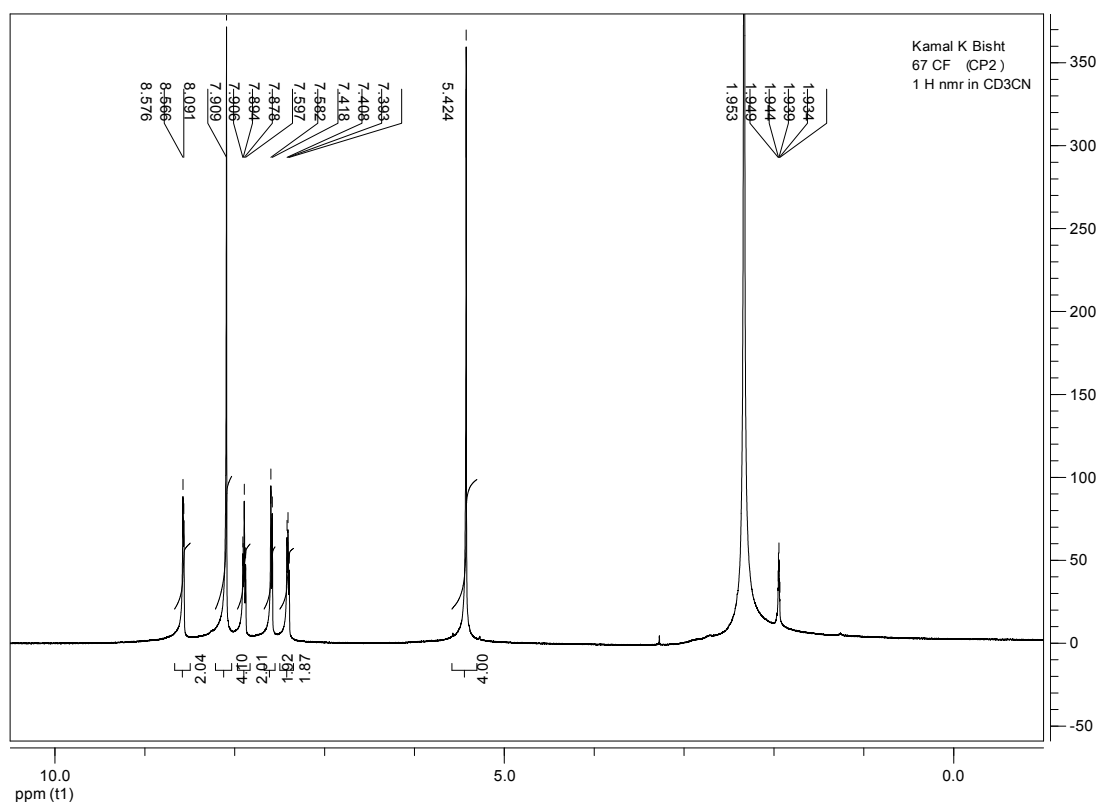

38

39 **S10:** <sup>1</sup>H NMR spectra for **2** in *d*<sub>3</sub>-acetonitrile

40

41

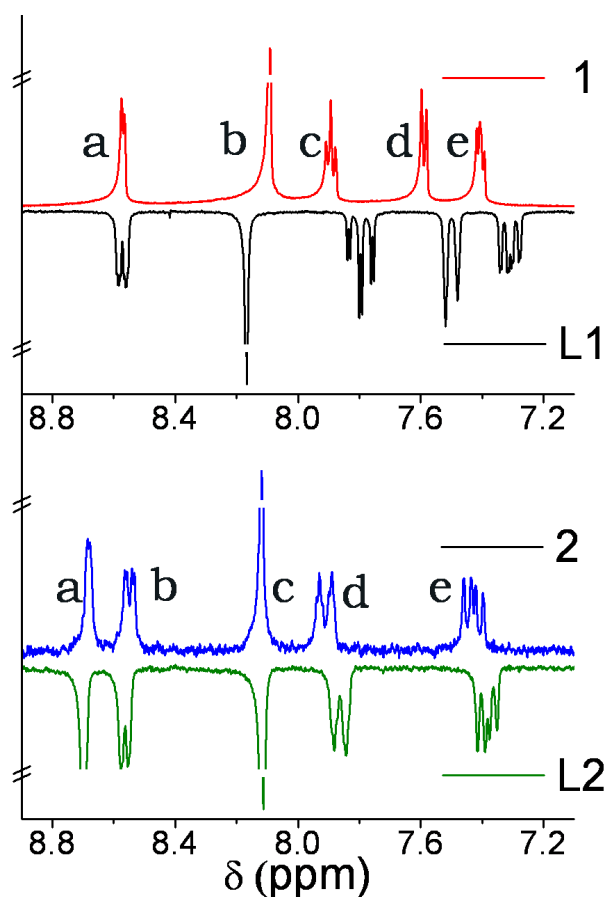

42

43 **S11:** Aromatic region of <sup>1</sup>H nmr spectra for complexes **1** and **2**. The <sup>1</sup>H nmr spectra of  
44 respective ligands are also given as reflection to show the shifting in pyridyl proton positions  
45 after complexation. a-e represents the pyridyl protons as shown in scheme S1.

46

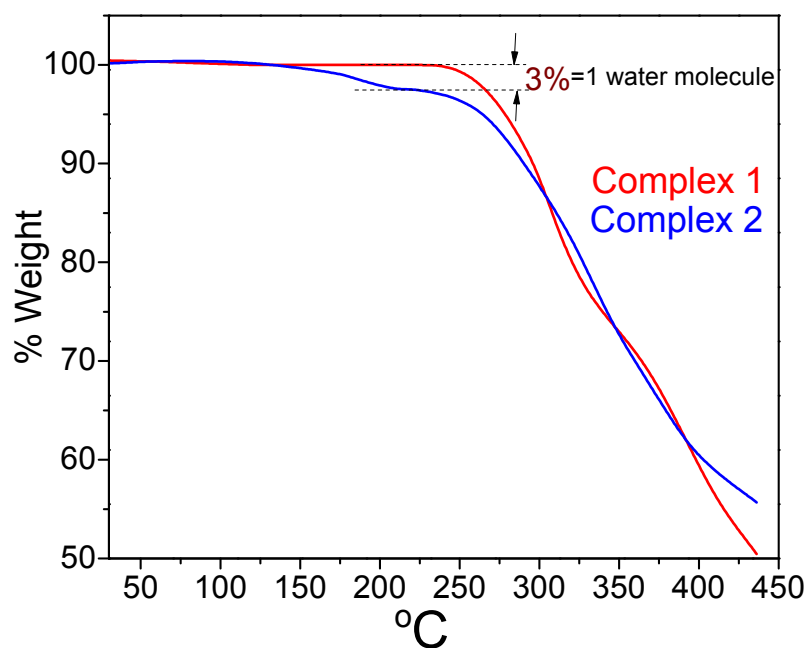

47

48 **S12:** TGA profiles of coordination polymers **1** and **2**

49

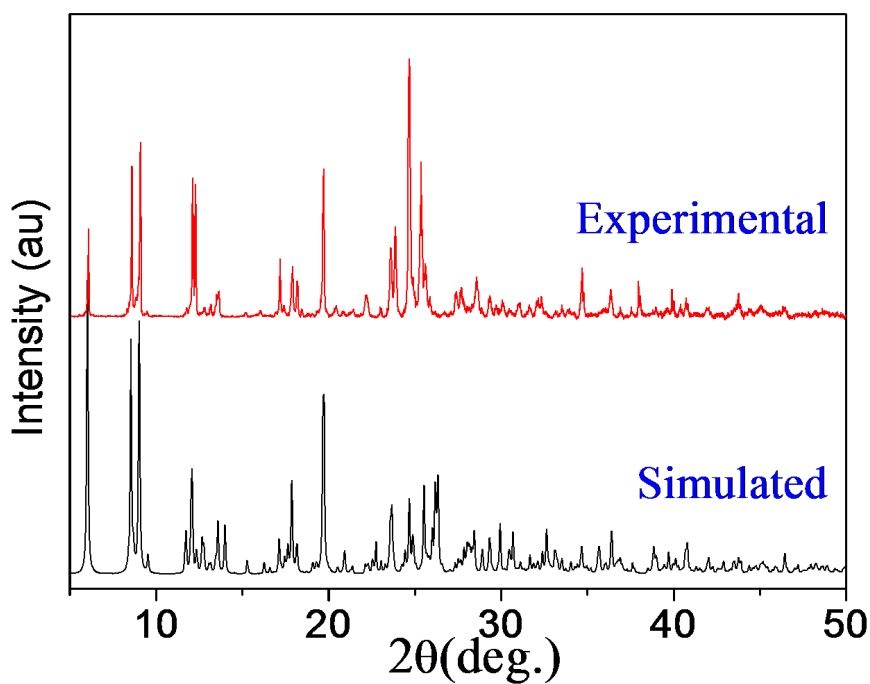

50

51 **S13:** Comparison of experimental and simulated XRPD profiles of complex 1

52

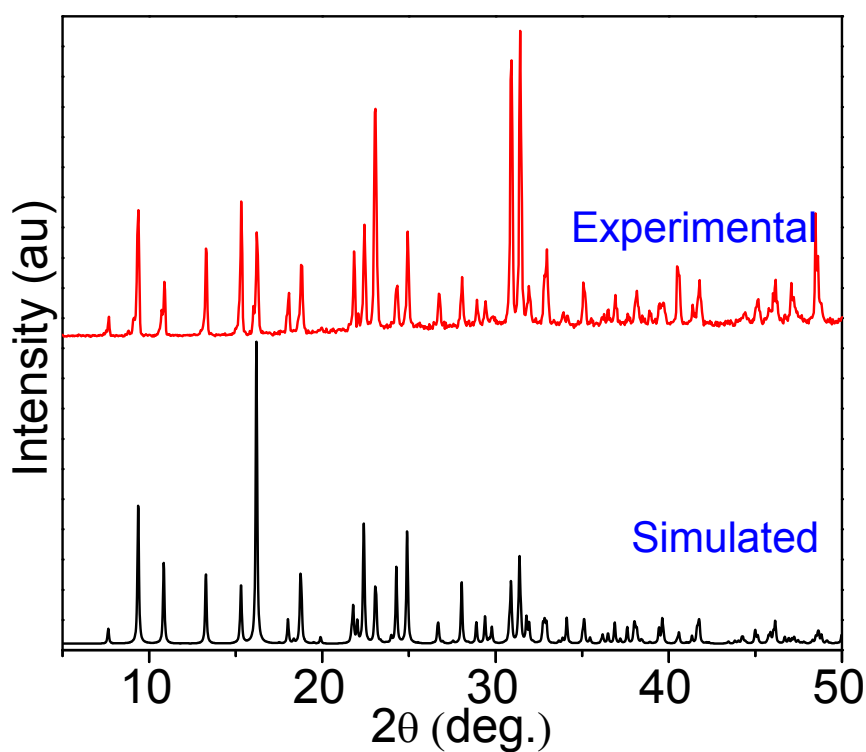

53

54 **S14:** Comparison of experimental and simulated XRPD profiles of complex 2

55

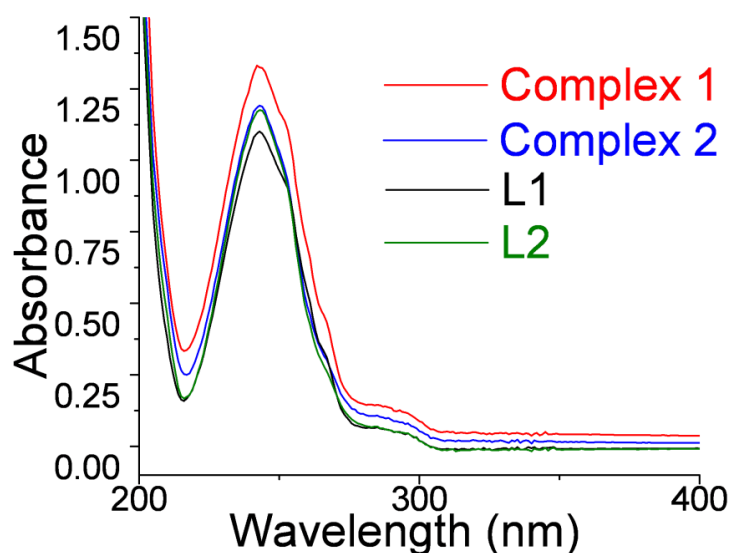

56

57 **S15:** Absorption spectra of compounds **1**, **2**, **L1** and **L2** in acetonitrile solutions ( $\sim 1 \times 10^{-4}$  M)  
58 at ambient temperature.

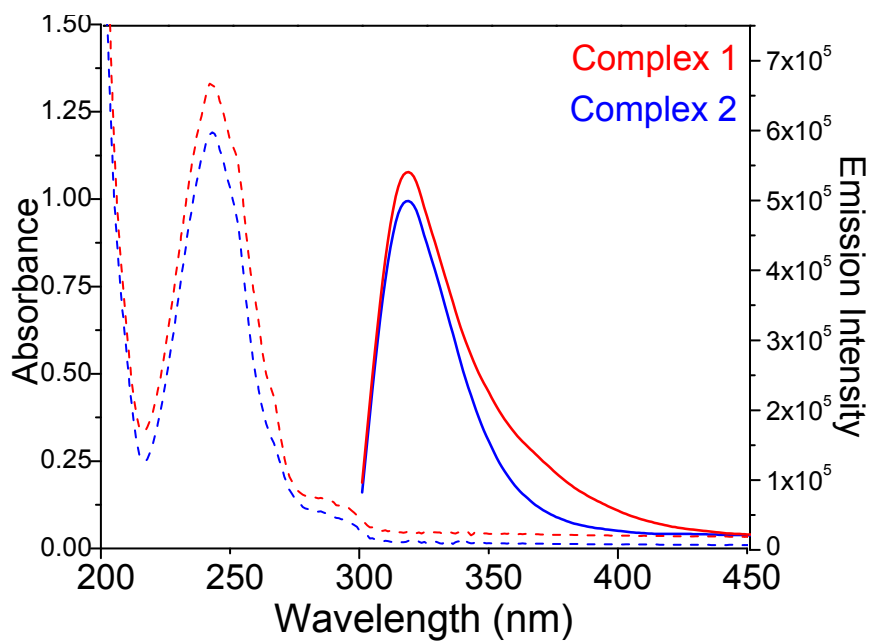

59

60

61 **S16:** Luminescence spectra of coordination polymers **1** and **2** in acetonitrile solutions ( $\sim 1 \times 10^{-4}$   
62 M) at ambient temperature. Absorption profiles are given as dotted plots for the sake of  
63 comparison.

64



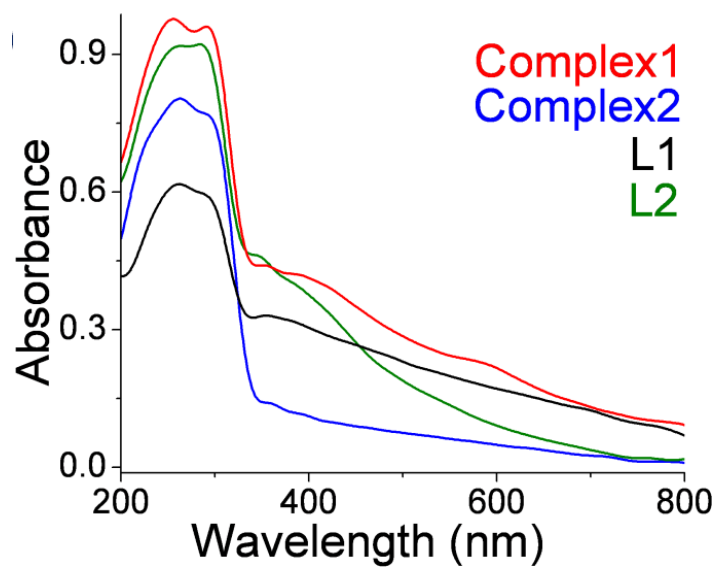

65

66 **S17:** Absorption spectra of compounds **1**, **2**, **L1** and **L2** in solid state at ambient temperature  
67 recorded using crystalline powder samples prepared by gentle crushing of crystals.

68

69

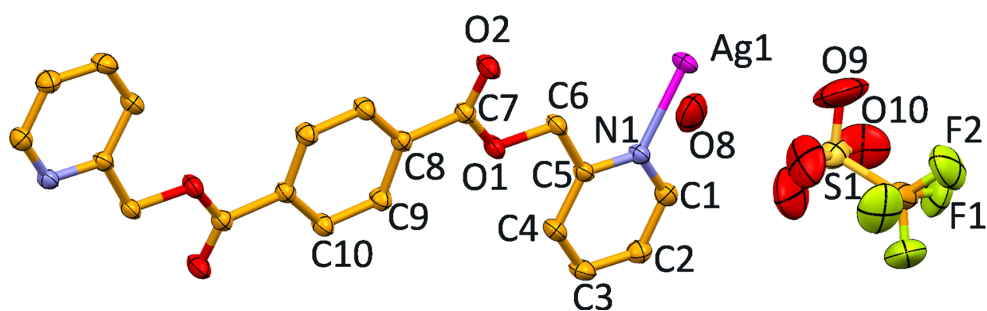

70

71 **S18:** ORTEP diagram of **2** with atom numbering scheme (40% probability factor for the thermal  
72 ellipsoids).

73

74

75 **Table S1:** Crystal Data and Refinement Parameters for Compound **L1**, **L2**, **Complex 1** & **2**

| Identification code                       | L1                                                            | L2                                                            | Complex 1                                                                                                    | Complex 2                                                                                                   |
|-------------------------------------------|---------------------------------------------------------------|---------------------------------------------------------------|--------------------------------------------------------------------------------------------------------------|-------------------------------------------------------------------------------------------------------------|
| Chemical formula                          | C <sub>20</sub> H <sub>16</sub> N <sub>2</sub> O <sub>4</sub> | C <sub>20</sub> H <sub>16</sub> N <sub>2</sub> O <sub>4</sub> | C <sub>44</sub> H <sub>35</sub> Ag <sub>2</sub> F <sub>6</sub> N <sub>5</sub> O <sub>14</sub> S <sub>2</sub> | C <sub>21</sub> H <sub>18</sub> Ag <sub>1</sub> F <sub>3</sub> N <sub>2</sub> O <sub>8</sub> S <sub>1</sub> |
| Formula weight                            | 348.35                                                        | 348.35                                                        | 1251.63                                                                                                      | 623.30                                                                                                      |
| Crystal Colour                            | Colourless                                                    | Colourless                                                    | Colourless                                                                                                   | Colourless                                                                                                  |
| Crystal Size (mm)                         | 0.61 x 0.30 x 0.15                                            | 0.33 x 0.23 x 0.05                                            | 0.28 x 0.14 x 0.08                                                                                           | 0.40 x 0.33 x 0.04                                                                                          |
| Temperature (K)                           | 100(2)                                                        | 293(2)                                                        | 110(2)                                                                                                       | 100(2)                                                                                                      |
| Crystal System                            | Monoclinic                                                    | Monoclinic                                                    | Triclinic                                                                                                    | Orthorhombic                                                                                                |
| Space Group                               | P2 <sub>1</sub> /n                                            | P2 <sub>1</sub> /c                                            | P-1                                                                                                          | Pbcn                                                                                                        |
| a(Å)                                      | 5.6023(9)                                                     | 7.831(3)                                                      | 11.2497(7)                                                                                                   | 5.9957(11)                                                                                                  |
| b(Å)                                      | 16.038(2)                                                     | 8.838(3)                                                      | 14.6138(8)                                                                                                   | 23.128(4)                                                                                                   |
| c(Å)                                      | 9.1681(14)                                                    | 12.436(4)                                                     | 15.2418(9)                                                                                                   | 16.303(3)                                                                                                   |
| α(°)                                      | 90                                                            | 90                                                            | 85.752(2)                                                                                                    | 90                                                                                                          |
| β(°)                                      | 97.593(3)                                                     | 93.886(7)                                                     | 73.7830(10)                                                                                                  | 90                                                                                                          |
| γ(°)                                      | 90                                                            | 90                                                            | 72.581(3)                                                                                                    | 90                                                                                                          |
| Z                                         | 2                                                             | 2                                                             | 2                                                                                                            | 4                                                                                                           |
| V(Å <sup>3</sup> )                        | 816.5(2)                                                      | 858.7(5)                                                      | 2295.6(2)                                                                                                    | 2260.7(7)                                                                                                   |
| Density (Mg/m <sup>3</sup> )              | 1.417                                                         | 1.347                                                         | 1.811                                                                                                        | 1.831                                                                                                       |
| Absorption Coefficient(mm <sup>-1</sup> ) | 0.100                                                         | 0.095                                                         | 1.043                                                                                                        | 1.061                                                                                                       |
| F(000)                                    | 364                                                           | 364                                                           | 1252                                                                                                         | 1248                                                                                                        |
| Reflections Collected                     | 4862                                                          | 5928                                                          | 19515                                                                                                        | 12013                                                                                                       |
| Independent Reflections                   | 1906                                                          | 1508                                                          | 10313                                                                                                        | 2475                                                                                                        |
| R <sub>(int)</sub>                        | 0.0335                                                        | 0.0537                                                        | 0.0181                                                                                                       | 0.0243                                                                                                      |
| Number of parameters                      | 150                                                           | 150                                                           | 654                                                                                                          | 178                                                                                                         |
| S(Goodness of Fit) on F <sup>2</sup>      | 1.247                                                         | 1.119                                                         | 1.032                                                                                                        | 1.093                                                                                                       |
| Final R1/wR2 (I>2σ(I))                    | 0.0681/ 0.1606                                                | 0.0739 / 0.1442                                               | 0.0396/ 0.1077                                                                                               | 0.0433/ 0.1057                                                                                              |
| Weighted R1/wR2(all data)                 | 0.0820/0.1766                                                 | 0.1239 / 0.1645                                               | 0.0418/ 0.1094                                                                                               | 0.0516/ 0.1106                                                                                              |
| CCDC Number                               | 868386                                                        | 868387                                                        | 868388                                                                                                       | 868389                                                                                                      |

76

77

78

79

80  
 81  
 82  
 83

**Table S2. Hydrogen Bonding Table for Complex 1 and Complex 2**

| <b>Complex 1</b>                                                           |                     |                     |                      |
|----------------------------------------------------------------------------|---------------------|---------------------|----------------------|
| <b>D-H...A</b>                                                             | <b>d(H...A) (Å)</b> | <b>d(D...A) (Å)</b> | <b>∠ D-H...A (°)</b> |
| C(1)–H(1).....O(14) <sup>1</sup>                                           | 2.45                | 3.183(3)            | 136                  |
| C(3)–H(3)....O(3) <sup>2</sup>                                             | 2.38                | 3.215(3)            | 149                  |
| C(5)–H(5)...O(10) <sup>3</sup>                                             | 2.43                | 3.272(5)            | 150                  |
| C(6)–H(6A)...O(3) <sup>2</sup>                                             | 2.57                | 3.234(3)            | 126                  |
| C(15)–H(15B)....O(2) <sup>3</sup>                                          | 2.59                | 3.348(3)            | 135                  |
| C(20)–H(20)....O(12) <sup>3</sup>                                          | 2.58                | 3.485(4)            | 164                  |
| C(21)–H(21)....O(9) <sup>3</sup>                                           | 2.38                | 3.160(4)            | 141                  |
| C(30)–H(30)....O(11) <sup>1</sup>                                          | 2.60                | 3.199(5)            | 123                  |
| C(33)–H(33)....O(12) <sup>1</sup>                                          | 2.35                | 3.237(3)            | 160                  |
| C(38)–H(38)....O(13) <sup>4</sup>                                          | 2.54                | 3.378(4)            | 150                  |
| C(43)–H(43A)....O(11) <sup>5</sup>                                         | 2.53                | 3.320(10)           | 139                  |
| Symmetry code : 1. x,y,-1+z 2. 1+x,y,z 3. -1+x,y,z 4. 2-x,-y,-z 5. x, y, z |                     |                     |                      |
| <b>Complex 2</b>                                                           |                     |                     |                      |
| <b>D-H...A</b>                                                             | <b>d(H...A) (Å)</b> | <b>d(D...A) (Å)</b> | <b>∠ D-H...A (°)</b> |
| O(8)-H(8C)...O(10) <sup>1</sup>                                            | 2.07(6)             | 2.701(9)            | 151(7)               |
| C(6)-H(6A)...O(8) <sup>1</sup>                                             | 2.51                | 3.413(8)            | 154                  |
| C(6)-H(6B)...O(2) <sup>2</sup>                                             | 2.47                | 3.317(4)            | 146                  |
| Symmetry code : 1. x,y,z 2.1-x, y, 3/2-z                                   |                     |                     |                      |

84  
 85  
 86  
 87

88

89

**Table. S3:** Selected Bond Lengths(Å) and Angles(°) for Complexes **1** and **2**

| <b>Complex 1</b>                                                            |            |                                 |           |
|-----------------------------------------------------------------------------|------------|---------------------------------|-----------|
| Ag(1)-Ag(2)                                                                 | 3.3642(4)  | F(4)-C(42)                      | 1.339(3)  |
| Ag(1)-N(1)                                                                  | 2.169(2)   | F(5)-C(42)                      | 1.330(4)  |
| Ag(1)-N(2) <sup>#1</sup>                                                    | 2.168(2)   | F(6)-C(42)                      | 1.341(4)  |
| Ag(2)-N(3)                                                                  | 2.186(2)   | S(1)-O(9)                       | 1.430(2)  |
| Ag(2)-N(4) <sup>#2</sup>                                                    | 2.190(2)   | S(1)-O(10)                      | 1.423(3)  |
| Ag(2)-N(5)                                                                  | 2.716(3)   | S(1)-O(11)                      | 1.397(3)  |
| Ag(1)-O(14)                                                                 | 2.620 (4)  | S(1)-C(41)                      | 1.815(4)  |
| N(5)-C(44)                                                                  | 1.376(4)   | S(2)-O(12)                      | 1.438(2)  |
| F(1)-C(41)                                                                  | 1.346(5)   | S(2)-O(13)                      | 1.431(3)  |
| F(2)-C(41)                                                                  | 1.312(4)   | S(2)-O(14)                      | 1.445(2)  |
| F(3)-C(41)                                                                  | 1.282(5)   | S(2)-C(42)                      | 1.818(3)  |
| N(2) <sup>#1</sup> -Ag(1)-N(1)                                              | 161.93(9)  | N(4) <sup>#2</sup> -Ag(2)-Ag(1) | 80.86(6)  |
| N(2) <sup>#1</sup> -Ag(1)-Ag(2)                                             | 93.58(6)   | N(3)-Ag(2)-N(5)                 | 89.83(9)  |
| N(1)-Ag(1)-Ag(2)                                                            | 104.43(6)  | N(4) <sup>#2</sup> -Ag(2)-N(5)  | 94.04(9)  |
| N(3)-Ag(2)-N(4) <sup>#2</sup>                                               | 174.21(9)  | Ag(1)-Ag(2)-N(5)                | 133.80(6) |
| N(3)-Ag(2)-Ag(1)                                                            | 93.35(6)   |                                 |           |
| Symmetry transformations: <sup>#1</sup> x+1,y,z-1 ; <sup>#2</sup> x-1,y,z+1 |            |                                 |           |
| <b>Complex 2</b>                                                            |            |                                 |           |
| Ag(1)-N(1) <sup>#1</sup>                                                    | 2.149(3)   | S(1)-O(9) <sup>#1</sup>         | 1.292(6)  |
| C(11)-F(2) <sup>#1</sup>                                                    | 1.216(6)   | S(1)-O(10) <sup>#1</sup>        | 1.546(12) |
| C(11)-F(1) <sup>#1</sup>                                                    | 1.575(9)   | S(1)-C(11)                      | 1.737(9)  |
| N(1) <sup>#1</sup> -Ag(1)-N(1)                                              | 175.57(14) | O(1)-C(6)-C(5)                  | 108.4(2)  |
| C(1)-N(1)-Ag(1)                                                             | 117.0(2)   | C(7)-O(1)-C(6)                  | 116.4(2)  |
| C(5)-N(1)-Ag(1)                                                             | 124.5(2)   | O(1)-C(7)-C(8)                  | 112.0(3)  |
| Symmetry transformations: <sup>#1</sup> .-x,y,-z+3/2                        |            |                                 |           |

90
